# Supplementary material
Source: PubMed Central journal article supplement (PMC5367463)
Supplement: NIHMS845663-supplement-Supplemental_Digital_Content.pdf [file NIHMS845663-supplement-Supplemental_Digital_Content.pdf]

## **Appendix 1.**

The authors thank the following members and institutions that participated in the FASTER study.

### **FASTER Research Consortium**

*Columbia University, New York, NY: K. Welch and R. Denchy*

*University of Utah, Salt Lake City, UT, and Intermountain Health Care Perinatal Centers, Salt Lake City, Provo, and Ogden, UT: F. Porter, M. Belfort, B. Oshiro, L. Cannon, K. Nelson, C. Loucks, and A. Yoshimura*

*Swedish Medical Center, Seattle, WA: D. Luthy, and S. Coe*

*William Beaumont Hospital, Royal Oak, MI: D. Schmidt, and J. Esler*

*University of Texas Medical Branch, Galveston, TX: G. Hankins, G. Saade, and J. Lee*

*Mount Sinai Medical Center, New York, NY: K. Eddleman, and Y. Kharbutli*

*Montefiore Medical Center, Bronx, NY: I. Merkatz, and S. Carter*

*University of Colorado Health Science Center, Denver, CO: J. Hobbins, and L. Schultz*

*New York University Medical Center, New York, NY: M. Paidas, and J. Borsuk*

*Tufts University, Boston, MA: B. Isquith, and B. Berlin*

*Brown University, Providence, RI: C. Duquette*

*University of North Carolina, Chapel Hill, Chapel Hill, NC: R. Baughman*

*Eunice Shriver Kennedy National Institute of Child Health and Human Development, Bethesda, MD: J. Hanson, and F. de la Cruz*

*DM-STAT, Medford, MA: T. Tripp, D. Emig, and L. Sullivan*

Ananth CV, Wapner RJ, Ananth S, D'Alton ME, Vintzileos AM. First-trimester and second- trimester maternal serum biomarkers as predictors of placental abruption. *Obstet Gynecol* 2017; 129.

The authors provided this information as a supplement to their article.

©2017 American College of Obstetricians and Gynecologists.

*Wolfson Institute of Preventive Medicine, London: J. Bestwick*

**Independent Ultrasound Quality Assurance Committee**

*Eastern Virginia Medical School, Norfolk, VA: A. Abuhamad*

*Yale University School of Medicine, New Haven, CT: J. Copel*

**Independent Data-Monitoring Committee**

*California Pacific Medical Center, San Francisco, CA: J. Goldberg*

*Foundation for Blood Research, Scarborough, ME: J. Haddow*

*Magee-Women's Hospital, Pittsburgh, PA: A. Hogge*

*University of Pennsylvania, Philadelphia, PA: M. Mennuti*

Ananth CV, Wapner RJ, Ananth S, D'Alton ME, Vintzileos AM. First-trimester and second- trimester maternal serum biomarkers as predictors of placental abruption. *Obstet Gynecol* 2017; 129.

The authors provided this information as a supplement to their article.

©2017 American College of Obstetricians and Gynecologists.
